# Supplementary material
Source: publisher site journal article supplement (https://www.spandidos-publications.com/656/downloadSupplementary)

Figure S1. Expression levels of NCK1-AS1 in DU145, 22Rv1 and RWPE-1 cells. The expression level of NCK1-AS1 was also significantly higher in DU145 (2.7-fold) and 22Rv1 (3.3-fold) cells compared with in RWPE-1 cells. \*P<0.05. NCK1-AS1, NCK1 antisense RNA 1.

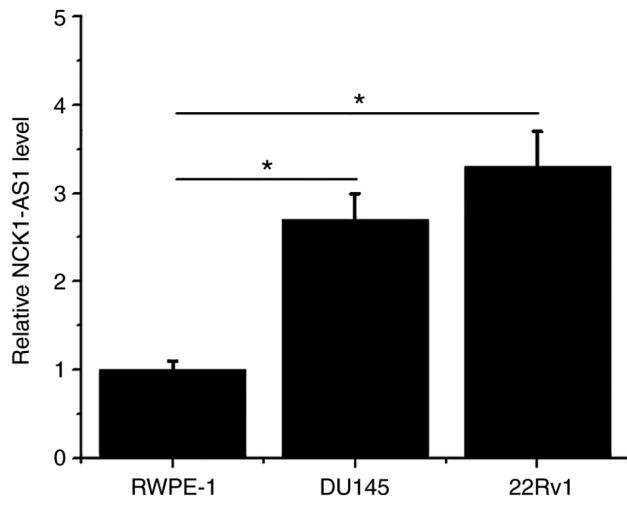

Figure S2. NCK1-AS1 levels are not significantly affected by Gleason score and clinical stages. NCK1-AS1 levels increased slightly with the increase of (A) Gleason score and (B) clinical stages, but the increases were not significant. NCK1-AS1, NCK1 antisense RNA 1.

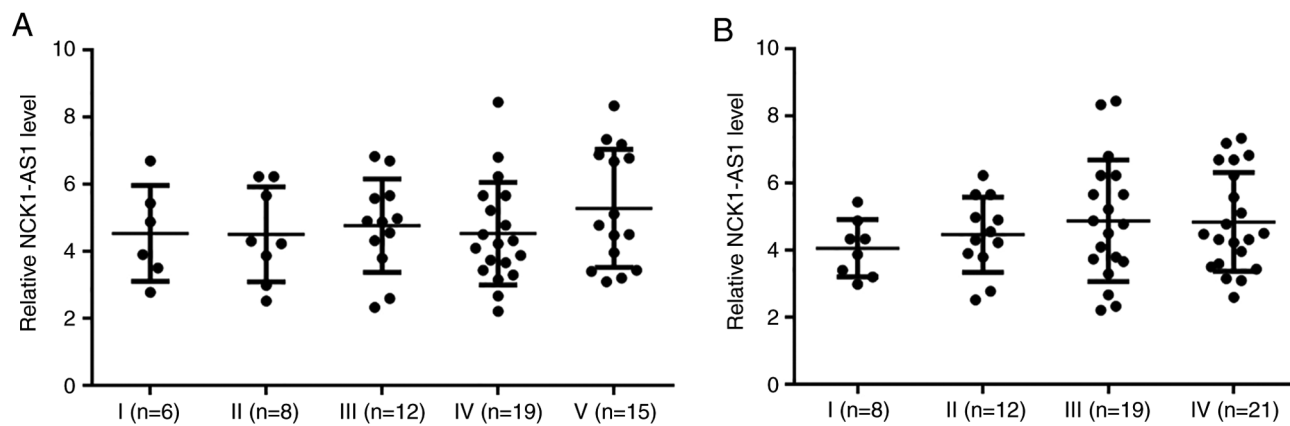

Figure S3. Upregulation of TGF- $\beta$ 1 distinguishes patients with PC from patients with BPH and healthy males. The receiver operator characteristic curve analysis was performed to evaluate the diagnostic value of plasma TGF- $\beta$ 1 for PC with (A) patients with BPH and (B) healthy males as true negative cases. TGF- $\beta$ 1, transforming growth factor  $\beta$ 1; PC, prostate cancer; BPH, benign prostatic hyperplasia.

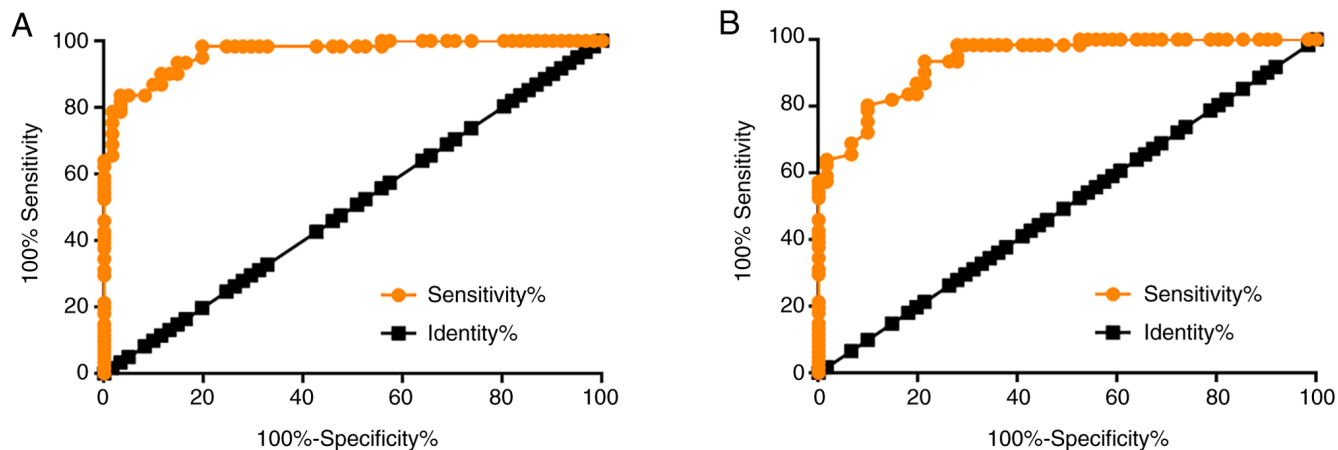

Supplement: Supplementary file 1 [file downloadSupplementary]
